# Supplementary material
Source: PubMed Central journal article supplement (PMC10576985)
Supplement: NIHMS1934455-supplement-Supplemental_Information.pdf [file NIHMS1934455-supplement-Supplemental_Information.pdf]

---

**Supplementary information**

---

**Inulin fibre promotes microbiota-derived bile acids and type 2 inflammation**

---

In the format provided by the authors and unedited

# Supplementary Figure 1: Overview of the MS2 network obtained in negative ion mode

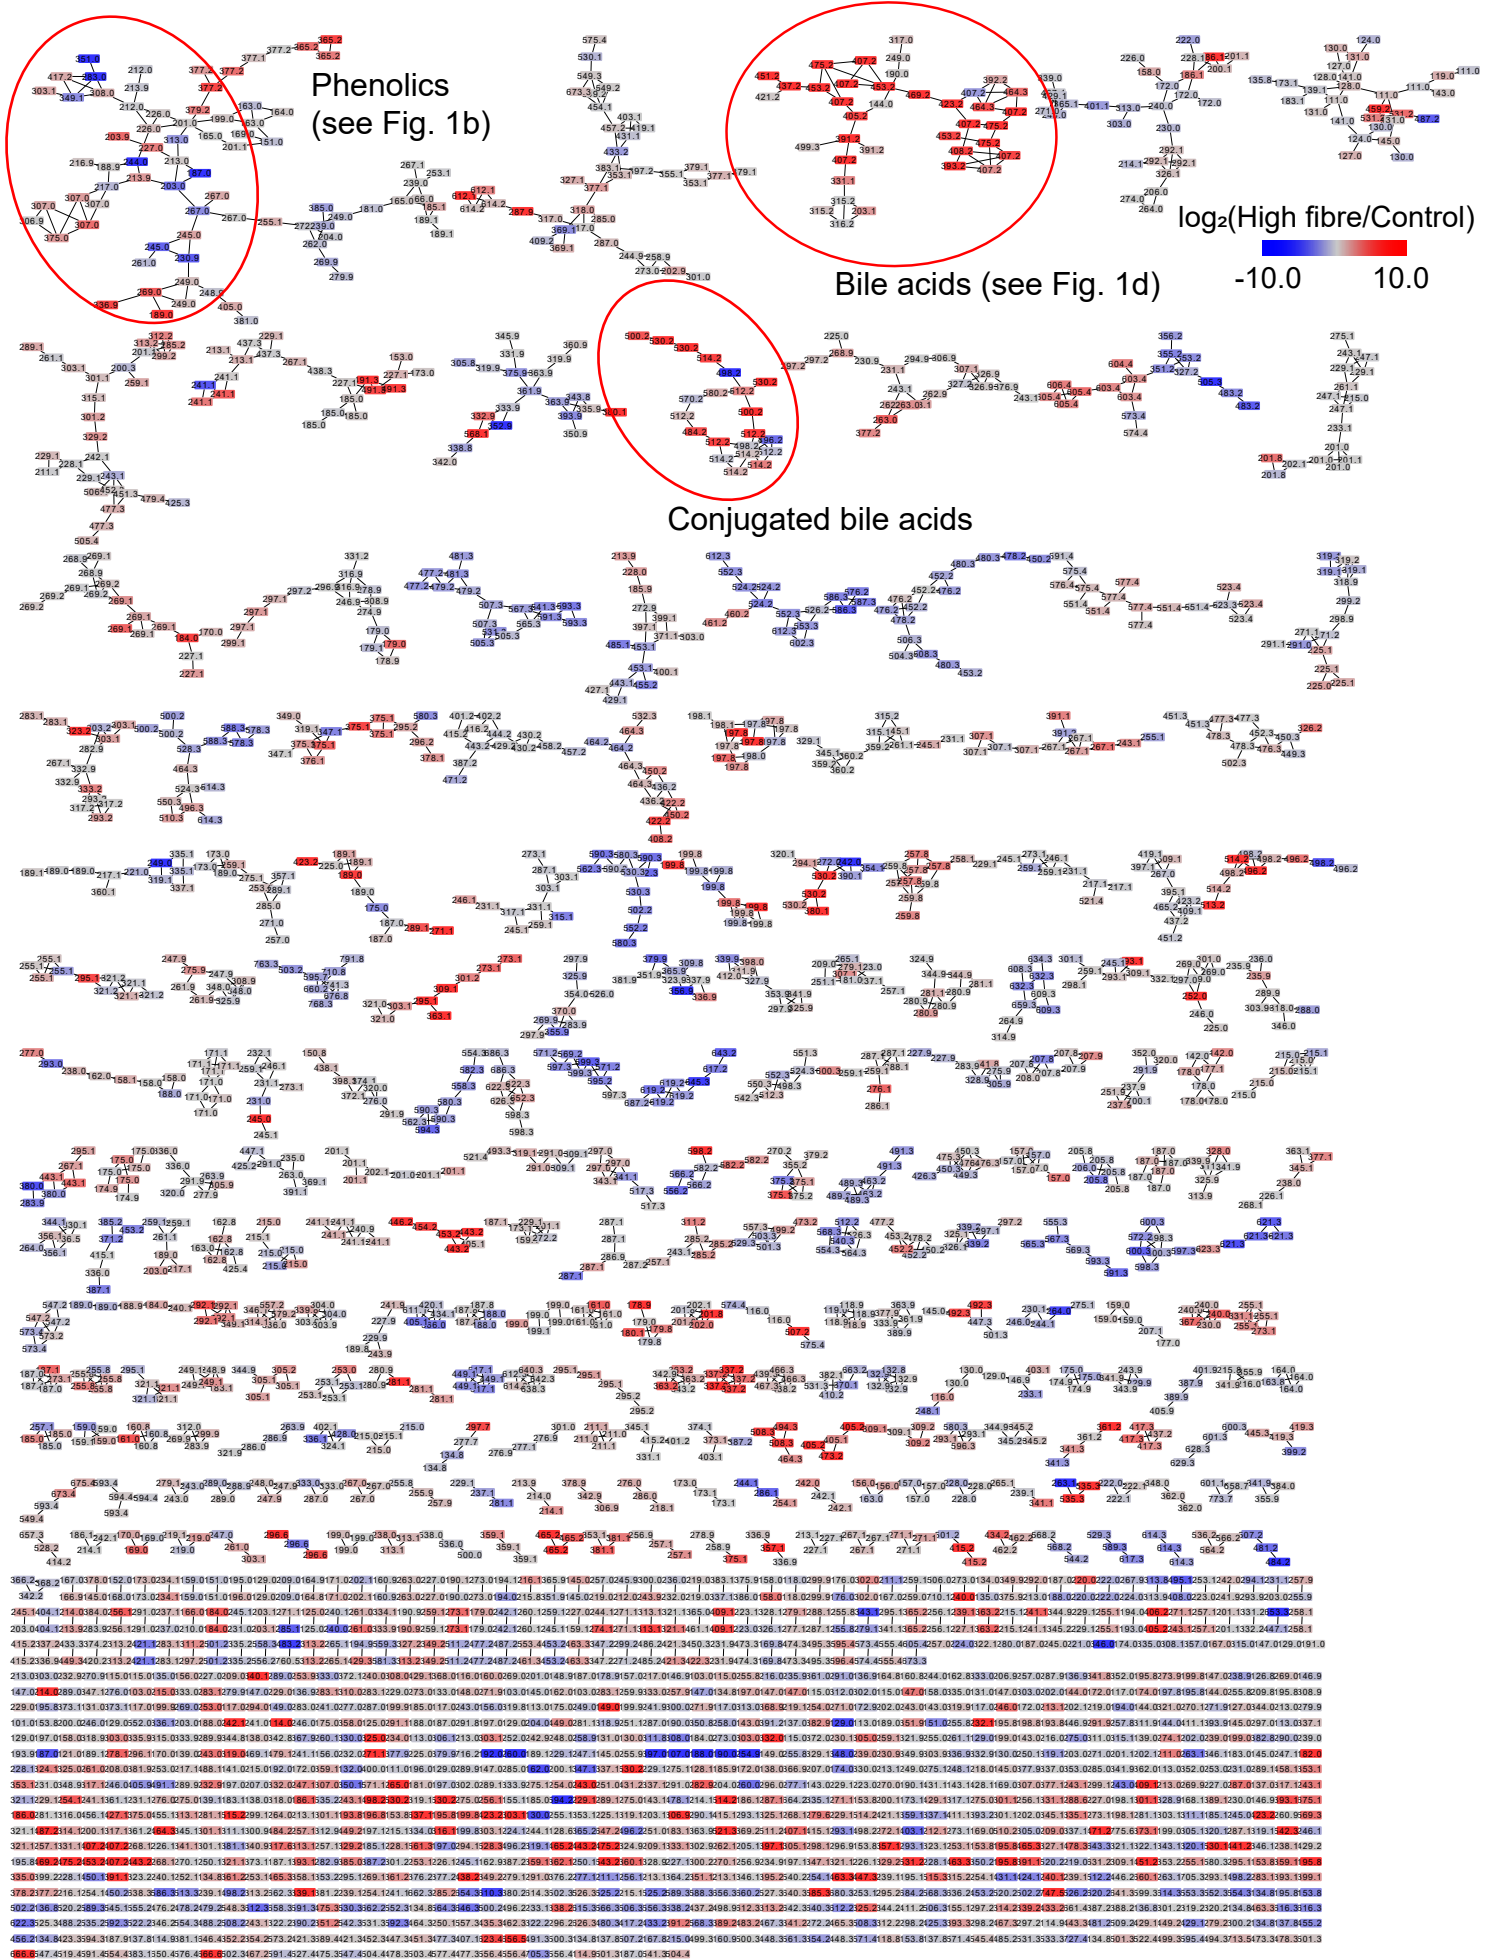

# Supplementary Figure 2: Overview of the MS2 network obtained in positive ion mode

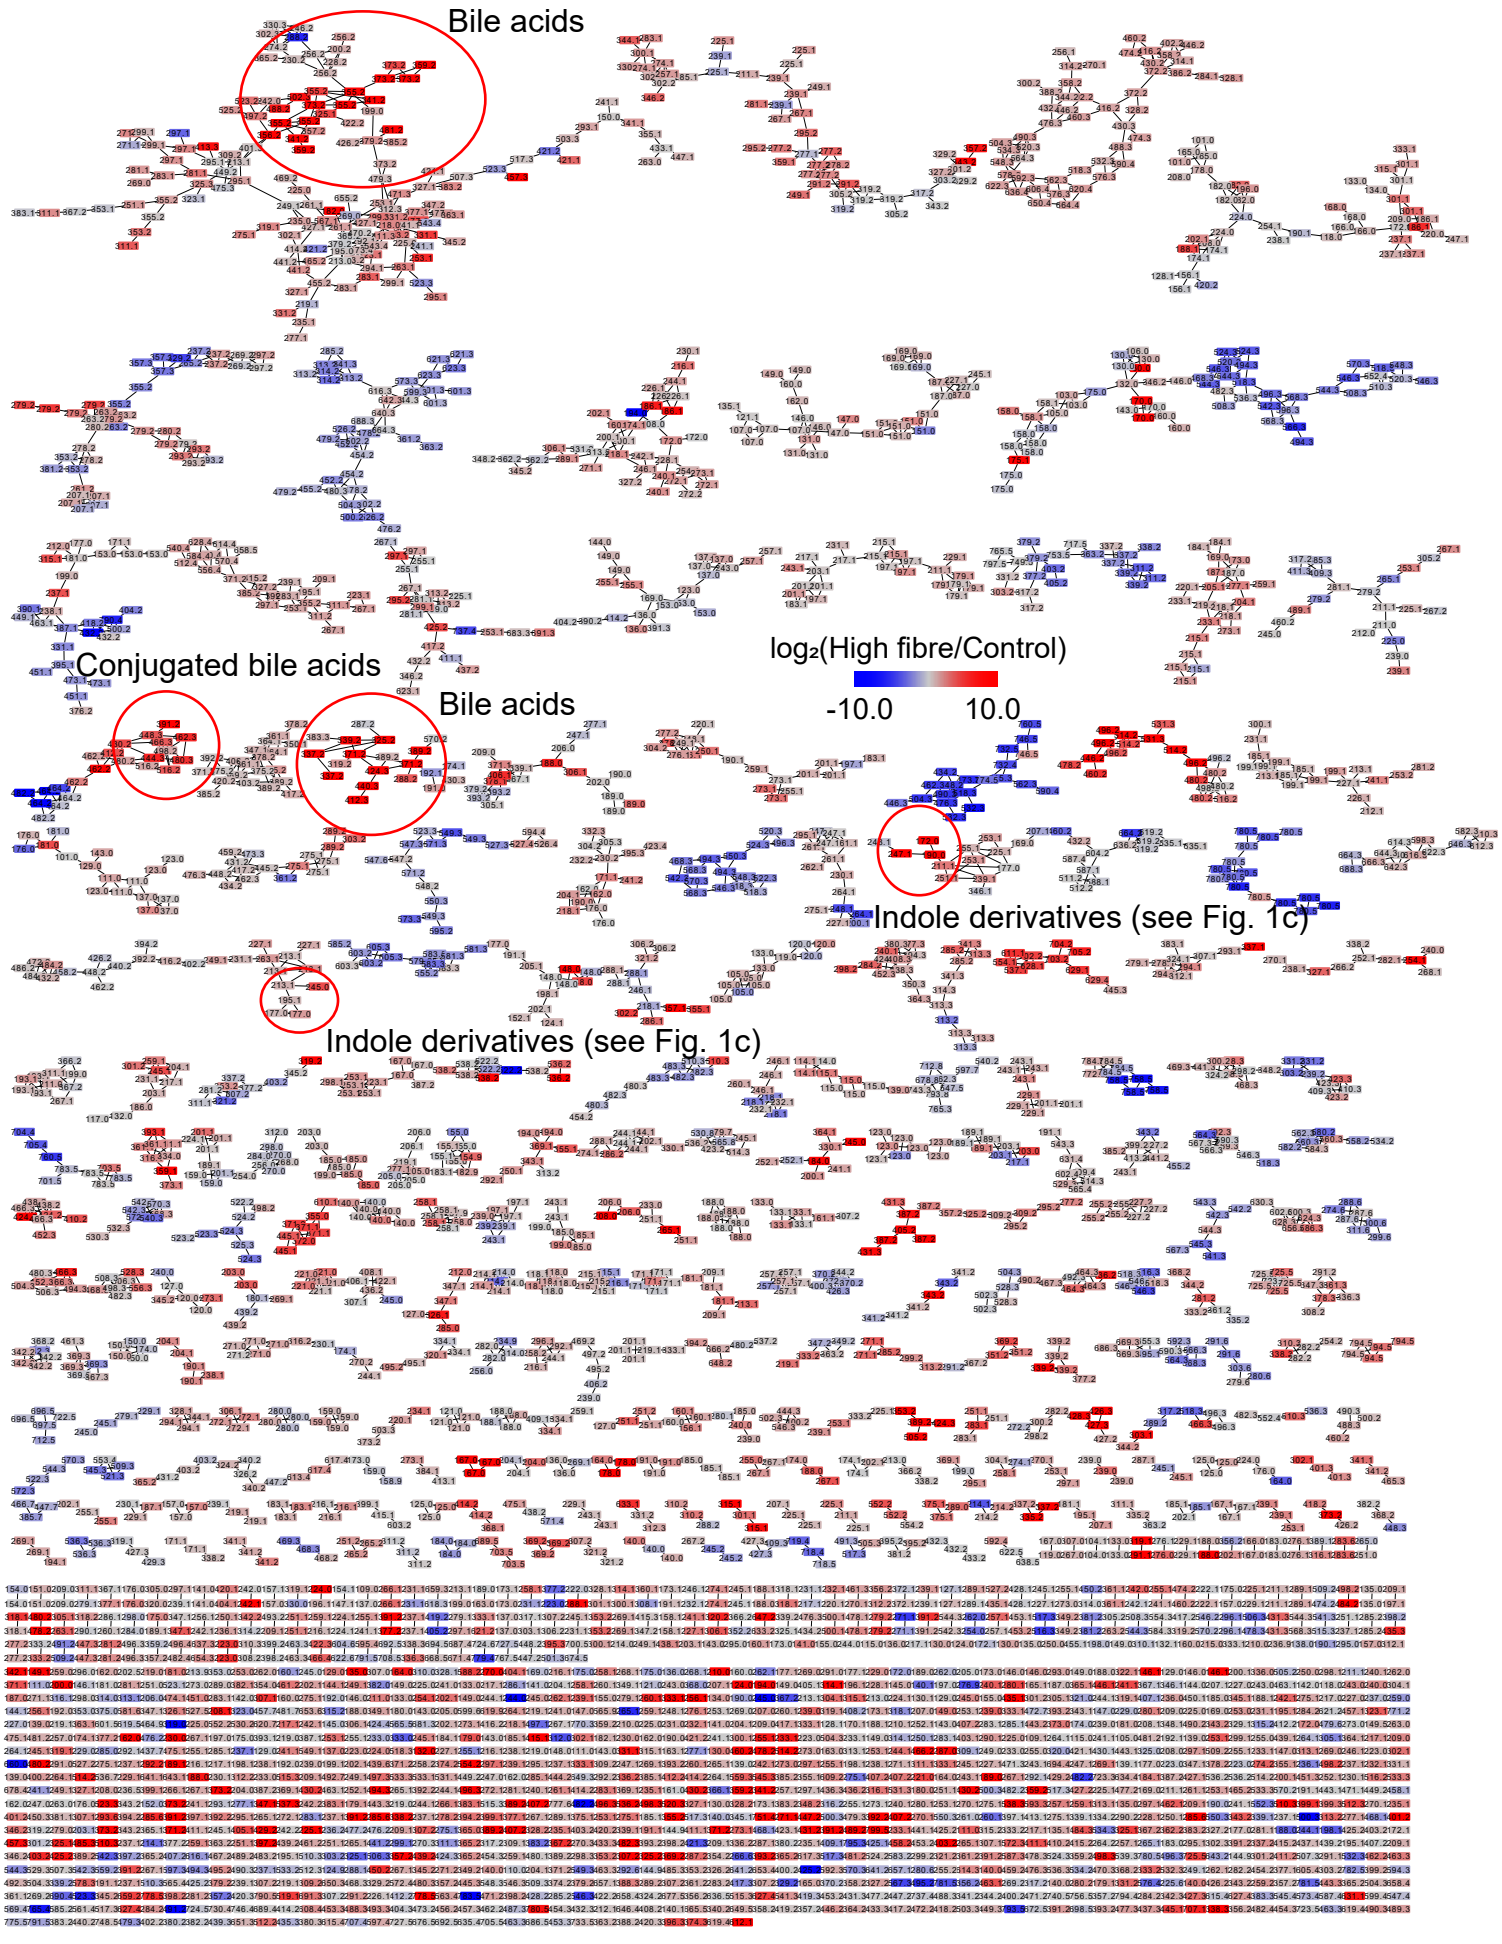

**Supplementary Table 1: Clinical metadata for human donors**

| Sample ID | Age | Gender | Health  | Sample |
|-----------|-----|--------|---------|--------|
| FMT1      | 30  | Male   | Healthy | Stool  |
| FMT2      | 51  | Female | Healthy | Stool  |
| FMT3      | 50  | Female | Healthy | Stool  |
| FMT4      | 27  | Female | Healthy | Stool  |

**Supplementary Table 2: Primers for BO\_02350 (cbh2) deletion used in the assembly with pExchange**

| Primer name     | Sequence                                     |
|-----------------|----------------------------------------------|
| pEx_Gib_F       | GGATCCACTAGTTCTAGAGC                         |
| pEx_Gib_R       | CCCGGGCTGCAGGAATTCG                          |
| BO_02350-F1     | CGAATTCCTGCAGCCCGGG<br>CGTGTGAACAAACAGGCTATC |
| BO_02350-R2     | GATACAGGAGCAGCCGGTTG                         |
| BO_02350-F3     | CAACCGGCTGCTCCTGTATC<br>CATACGGCAGCAATCCCTAG |
| BO_02350-R4     | GCTCTAGAACTAGTGGATCC<br>TACAATCCGGTCACCAAACG |
| BO_02350-Diag-F | CGCTCCCGTTGTCTTGTCTG                         |
| BO_02350-Diag-R | GAAGTTGCTCGATGCCAACC                         |
